# Supplementary material
Source: PubMed Central journal article supplement (PMC6413241)
Supplement: ajtr0011-1102-f2.pdf [file ajtr0011-1102-f2.pdf]

# Engineering glomerular podocyte's progenitor and mature podocyte

**Supplementary Table 1.** The List of Acronyms and the Nomenclature of Small Molecules

| Acronyms   |                                                                                                                       |
|------------|-----------------------------------------------------------------------------------------------------------------------|
| All        | Angiotensin II                                                                                                        |
| AA         | Activin A                                                                                                             |
| AA         | Allylamine                                                                                                            |
| AAT        | Aspartate transaminase                                                                                                |
| ACTA2      | Actin, alpha 2, smooth muscle, aorta                                                                                  |
| ACTN4      | Actinin alpha 4                                                                                                       |
| AD-MSC     | Adipose mesenchymal stem cells                                                                                        |
| AFP        | Alpha-fetoprotein                                                                                                     |
| AKT        | Akt/Protein kinase B                                                                                                  |
| ALB        | Albumin                                                                                                               |
| cAMP       | Cyclic adenosine monophosphate                                                                                        |
| APEL MEDIA | Animal product-free medium                                                                                            |
| AQP1       | Aquaporin 1                                                                                                           |
| AQP2       | Aquaporin 2                                                                                                           |
| AQP2       | Aquaporin 3                                                                                                           |
| Arp2       | Actin-related protein 2                                                                                               |
| Arp3       | Actin-related protein 3                                                                                               |
| Atf2       | Activating transcription factor 2                                                                                     |
| ATRA       | All trans retinoic acid                                                                                               |
| BM-MSC     | Bone marrow mesenchymal stem cells                                                                                    |
| BMP2       | Bone morphogenic protein 2                                                                                            |
| BMP3       | Bone morphogenic protein 3                                                                                            |
| BMP4       | Bone morphogenic protein 4                                                                                            |
| BMP5       | Bone morphogenic protein 5                                                                                            |
| BMP6       | Bone morphogenic protein 6                                                                                            |
| BMP7       | Bone morphogenic protein 7                                                                                            |
| BSA        | Bovine serum albumin                                                                                                  |
| CALB1      | Calbindin 1                                                                                                           |
| CatL       | Cathepsin L                                                                                                           |
| CCG1423    | N-[2-[(4-Chlorophenyl)amino]-1-methyl-2-oxoethoxy]-3,5-bis(trifluoromethyl)benzamide                                  |
| CD2AP      | CD2-associated protein                                                                                                |
| CDH        | Cadherins                                                                                                             |
| CNN        | Calponin                                                                                                              |
| CD13       | Cluster of differentiation 13                                                                                         |
| CDH16      | Cadherin 16/kidney specific protein (Ksp)                                                                             |
| CD24       | Cluster of differentiation 24                                                                                         |
| CD31       | Cluster of differentiation 31                                                                                         |
| CD133      | Cluster of differentiation 133                                                                                        |
| Cdc42      | Cell division control protein 42 homolog                                                                              |
| CG         | Collapsing glomerulopathy                                                                                             |
| ChIP       | Chromatin immunoprecipitation                                                                                         |
| ChIP-Seq   | Chromatin immunoprecipitation-sequencing                                                                              |
| CHIR99021  | 6-[[2-[[[4-(2,4-Dichlorophenyl)-5-(5-methyl-1H-imidazol-2-yl)-2-pyrimidinyl]amino]ethyl]amino]-3-pyridinecarbonitrile |
| CITED1     | Cbp/P300 Interacting transactivator with Glu/Asp rich carboxy-terminal domain 1                                       |
| C-Jun      | Transcription factor activator protein 1 (AP-1)/Jun proto-oncogene                                                    |
| CK8        | Cytokeratin 8                                                                                                         |
| CKD        | Chronic kidney disease                                                                                                |
| CLIC5      | Chloride intracellular channel 5                                                                                      |
| c-MYC      | c-myc protein                                                                                                         |
| COL1A1     | Collagen, type I, alpha 1                                                                                             |
| CP21R7     | 3-(3-aminophenyl)-4-(1-methyl-1H-indol-3-yl)-1H-pyrrole-2,5-dione                                                     |
| CRABP2     | Cellular retinoic acid binding protein 2                                                                              |
| CREB       | cAMP-response element binding protein                                                                                 |
| CRYM       | Crystallin, mutated                                                                                                   |

## Engineering glomerular podocyte's progenitor and mature podocyte

|                |                                                                                  |
|----------------|----------------------------------------------------------------------------------|
| DB             | Dolichos biflorus                                                                |
| DBDs           | DNA binding domains                                                              |
| DII            | Delta-like                                                                       |
| DMEM           | Dulbecco's Modified Eagle Medium                                                 |
| DMEM/F:12      | Dulbecco's Modified Eagle Medium: Nutrient Mixture F-12                          |
| DNA            | Deoxyribonucleic acid                                                            |
| DNase I        | Deoxyribonuclease I                                                              |
| DNase-Seq      | DNase I hypersensitive sites sequencing                                          |
| DNMT3b         | DNA (cytosine-5-)-methyltransferase 3 beta                                       |
| Dpc            | Days post coitum                                                                 |
| DynaMo         | Dynamic motif occupancy analysis                                                 |
| EBSs           | Embroid bodies                                                                   |
| E-CDH          | Epithelial cadherin [CDH1-cadherin 1, type 1, E-cadherin (epithelial)]           |
| ECM            | Extracellular matrix                                                             |
| EdU            | 5-Ethynyl-2'-deoxyuridine                                                        |
| EGF            | Epidermal growth factor                                                          |
| ELF1           | E74-like factor 1 (ets domain transcription factor)                              |
| EMX2           | Empty spiracles homeobox 2                                                       |
| EMT            | Epithelial to mesenchymal                                                        |
| EOMES          | Eomesodermin                                                                     |
| ESCs           | Embryonic stem cells                                                             |
| Ets1           | Transcription factor/avian erythroblastosis virus E26 (V-Ets) oncogene homolog-1 |
| EYA1           | Eyes absent (Drosophila) homolog 1                                               |
| FACS           | Fluorescence-activated cell sorting                                              |
| FAT-1          | Protein fat homolog/cadherin-related family member 8                             |
| F-Actin        | Filamentous actin                                                                |
| FBS            | Fetal bovine serum                                                               |
| FCS            | Fetal calf serum                                                                 |
| FcRn           | Neonatal Fc receptor                                                             |
| FGF1           | Fibroblast growth factor 1                                                       |
| FGF2           | Fibroblast growth factor 2                                                       |
| FGF7           | Fibroblast growth factor 7                                                       |
| FGF9           | Fibroblast growth factor 9                                                       |
| FGF10          | Fibroblast growth factor 10                                                      |
| FGFR           | Fibroblast growth factor receptor                                                |
| FIT-C          | Fluorescein isothiocyanate                                                       |
| Flk1           | Fetal liver kinase 1                                                             |
| FOXA2          | Forkhead box A2                                                                  |
| FOXD1          | Forkhead box D1                                                                  |
| FOXF1          | Forkhead box F1                                                                  |
| FSGS           | Focal segmental glomerulosclerosis                                               |
| GABRB3         | Gamma-aminobutyric acid (GABA) A receptor, beta 3                                |
| GATA3          | GATA binding protein 3                                                           |
| GBM            | Glomerular basement membrane                                                     |
| GDF3           | Growth differentiation factor 3                                                  |
| GDNF           | Glial cell derived neurotrophic factor                                           |
| GFB            | Glomerular filtration barrier                                                    |
| GFP            | Green fluorescent protein                                                        |
| GFRA1          | GDNF family receptor alpha 1                                                     |
| GGT1           | Gamma-glutamyltransferase 1                                                      |
| GLEPP1         | Glomerular epithelial protein 1                                                  |
| GPCRs          | G-protein coupled receptors                                                      |
| GSK3 $\beta$ 1 | Glycogen synthase kinase 3 beta 1                                                |
| hAD-MSCs       | Human adipose derived mesenchymal stem cells                                     |
| HC             | Histochemistry                                                                   |
| HDAC           | Histone deacetylase                                                              |

## Engineering glomerular podocyte's progenitor and mature podocyte

|           |                                                                 |
|-----------|-----------------------------------------------------------------|
| Hes       | Hairy enhancer of split                                         |
| hES       | Human embryonic stem cells                                      |
| Hey       | Hes related repressor proteins                                  |
| HMGA2     | High mobility group AT-hook 2                                   |
| HNA       | Human nuclear antigen                                           |
| HOXB7     | Homeo box B7                                                    |
| HOXD11    | Homeobox D11                                                    |
| HOXA11    | Homeobox DA11                                                   |
| HPRT      | Hypoxanthine phosphoribosyltransferase 1                        |
| HSCs      | Hematopoietic stem cells                                        |
| HuMt      | Human mitochondria                                              |
| HuNu      | Human nuclei antigen                                            |
| ICC       | Immunocytochemistry                                             |
| IgA       | Immunoglobulin A                                                |
| IGF1      | Insulin-like growth factor 1                                    |
| IGF-R     | Insulin-like growth factor 1 receptor                           |
| IHC       | Immunohistochemistry                                            |
| IM        | Intermediate mesoderm                                           |
| IMF       | Immunofluorescence                                              |
| iNP       | Induced nephron progenitor                                      |
| iPSCs     | Induced pluripotent stem cells                                  |
| JAG1      | Jagged 1                                                        |
| Ki-67     | Proliferation-related Ki-67 antigen                             |
| KLF15     | Kruppel like factor 15                                          |
| KRT18     | Cytokeratin 18                                                  |
| KSCs      | Kidney derived stem cells                                       |
| LHX1      | LIM homeobox protein 1                                          |
| LIF       | Leukemia inhibitory factor                                      |
| LIM1      | LIM homeobox 1 (LHX1)                                           |
| LY294002  | 2-(4-Morpholinyl)-8-phenyl-1(4H)-benzopyran-4-one hydrochloride |
| MAFB      | Kreisler (Mouse) Maf-related leucine zipper homolog             |
| MAP2      | Microtubule-associated protein 2                                |
| MCN       | Minimal change disease                                          |
| ME        | Mesoderm                                                        |
| MEOX2     | Mesenchyme homeobox 2                                           |
| mES       | Mouse embryonic stem cells                                      |
| MET       | Mesenchymal to epithelial transition                            |
| mi-RNA    | Micro ribonucleic acid                                          |
| MIXL1     | Mix paired-like homeobox                                        |
| MM        | Metanephric mesenchyme                                          |
| MPP5      | Membrane protein palmitoylated 5                                |
| MYC       | Myelocytomatosis oncogene                                       |
| mTG       | Microbial transglutaminase                                      |
| MUCIN1    | Mucin 1, cell surface associated                                |
| MYH11     | Myosin heavy chain 11                                           |
| NANOG     | Nanog homeobox                                                  |
| NCAM      | Neural cell adhesion molecule 1                                 |
| N-CDH     | N-cadherin                                                      |
| NCK1      | Non-catalytic region of tyrosine kinase adaptor protein 1       |
| NCK2      | Non-catalytic region of tyrosine kinase adaptor protein 2       |
| NEAA      | Non-essential amino acid                                        |
| NES       | Nestin                                                          |
| NICD      | Notch intracellular domain                                      |
| NKX2.5    | NK2 transcription factor related, locus 5                       |
| NMYC/MYCN | MYCN Proto-oncogene, BHLH transcription factor                  |
| NP        | Nephron progenitor                                              |

## Engineering glomerular podocyte's progenitor and mature podocyte

|                  |                                                                                                     |
|------------------|-----------------------------------------------------------------------------------------------------|
| NPCs             | Nephron progenitor cells                                                                            |
| NPHS1            | Nephrin                                                                                             |
| NPHS2            | Podocin                                                                                             |
| NTNG1            | Netrin G1                                                                                           |
| OCT4/POU5F1      | Octamer-binding transcription factor 4/POU class 5 homeobox 1                                       |
| OD               | Octadiene                                                                                           |
| OSR1             | Odd-skipped related 1                                                                               |
| P                | Passage                                                                                             |
| P27              | IFI27 (interferon, alpha-inducible protein 27)                                                      |
| P57              | Cyclin-dependent kinase inhibitor 1C                                                                |
| P85              | PI3K regulatory subunit alpha                                                                       |
| aPKC-PAR3-PAR6   | Atypical protein kinase C-partitioning defective 3 homolog-partitioning defective 6 homolog complex |
| PAX2             | Paired box 2                                                                                        |
| PAX6             | Paired box 6                                                                                        |
| PAX8             | Paired box 8                                                                                        |
| PCR              | Polymerase chain reaction                                                                           |
| P-CDH            | Podocyte cadherin                                                                                   |
| PECAM1           | Platelet and endothelial cell adhesion molecule 1                                                   |
| PenStrep         | Penicillin Streptomycin                                                                             |
| PFMS             | Position frequency matrices                                                                         |
| PI3Ks            | Phosphoinositide 3-kinases                                                                          |
| PIQ              | Protein interaction quantitation                                                                    |
| PKA              | Protein kinase A                                                                                    |
| PKB              | Protein kinase B/Akt                                                                                |
| PKC $\lambda$ /I | Protein kinase C lambda/iota                                                                        |
| PNA              | Peanut agglutinin                                                                                   |
| POD1             | Podocyte expressed 1                                                                                |
| PODXL            | Podocalyxin-like protein 1                                                                          |
| PS               | Primitive streak                                                                                    |
| PSEN             | Presenilin                                                                                          |
| qRT-PCR          | Quantitative real time polymerase chain reaction                                                    |
| RA               | Retinoic acid                                                                                       |
| Rac1             | Rac family small GTPase 1                                                                           |
| RAF1             | v-raf-1 murine leukemia viral oncogene homolog 1                                                    |
| RBP-J            | Recombination signal binding protein for immunoglobulin kappa J region                              |
| RET              | Rearranged during transfection                                                                      |
| RFP              | Red fluorescent protein                                                                             |
| RHO/ROCK         | Rho-associated coiled-coil forming protein serine/threonine kinase                                  |
| RPMI-1640        | Roswell Park Memorial Institute (RPMI) 1640                                                         |
| RRT              | Renal replacement therapy                                                                           |
| RSAD2            | Radical S-adenosyl methionine domain-containing protein 2                                           |
| RTKs             | Receptor tyrosine kinases                                                                           |
| RUNX2            | Runt-related transcription factor 2                                                                 |
| SALL1            | Spalt like transcription factor 1                                                                   |
| SD               | Slit diaphragm                                                                                      |
| SEM              | Scanning electron microscope                                                                        |
| SIX2             | Sine oculis homeobox homolog 1                                                                      |
| SIX2             | Sine oculis homeobox homolog 2                                                                      |
| SLC12A3          | Solute carrier family 12 member 3                                                                   |
| SLC3A1           | Solute carrier family 3 member 1                                                                    |
| Slug             | Snail family transcriptional repressor 2/SNAI2                                                      |
| SULT1B1          | Sulfotransferase family 1B member 1                                                                 |
| $\alpha$ -SMA    | Alpha smooth muscle actin                                                                           |
| SNAI1            | Snail family transcriptional repressor 1                                                            |
| SNAI2            | Snail family transcriptional repressor 2                                                            |
| SOX1             | SRY-Box 1/SRY (sex determining region Y)-box 1                                                      |

## Engineering glomerular podocyte's progenitor and mature podocyte

|                        |                                                                                 |
|------------------------|---------------------------------------------------------------------------------|
| SOX2                   | SRY-Box 2/SRY (sex determining region Y)-box 2                                  |
| SOX3                   | SRY-Box 3/SRY (sex determining region Y)-box 3                                  |
| SOX17                  | SRY-Box 17/SRY (sex determining region Y)-box 17                                |
| SSEA4                  | Stage-specific embryonic antigen-4                                              |
| SULT1B1                | Sulfotransferase family 1B member 1                                             |
| SYNPO                  | Synaptopodin                                                                    |
| T                      | T-box proteins (Brachyury)                                                      |
| TBX6                   | T-box 6                                                                         |
| TCF                    | T cell factor                                                                   |
| TDGF1                  | Teratocarcinoma-derived growth factor 1                                         |
| TEM                    | Transmission electron microscope                                                |
| TFBs                   | Transcription factor binding sites                                              |
| TFs                    | Transcription factors                                                           |
| TGFB1                  | Transforming growth factor, beta 1                                              |
| TGFB2                  | Transforming growth factor, beta 2                                              |
| TIE2                   | Tyrosine kinase with Ig and EGF homology domains-2                              |
| TJP1                   | Tight junction protein 1                                                        |
| TRA1-1-61              | Tumour-related antigen [TRA]-1-60                                               |
| TRA-1-81               | Tumour-related antigen [TRA]-1-81                                               |
| TRPC5                  | Transient receptor potential cation channel subfamily C member 5                |
| TRPC6                  | Transient receptor potential cation channel subfamily C member 6                |
| TUJ1                   | Neuron-specific class III $\beta$ -tubulin                                      |
| UB                     | Ureteric bud                                                                    |
| UE                     | Ureteric epithelium                                                             |
| VEGF                   | Vascular endothelial growth factor                                              |
| VEGFR2                 | Vascular endothelial growth factor 2                                            |
| VIM                    | Vimentin                                                                        |
| VPA                    | Valproic acid                                                                   |
| VRAD                   | Vitamin D3, retinoic, acid and DMEM/F12                                         |
| WGA lectin             | Wheat germ agglutinin                                                           |
| Wnt                    | Wingless/Integrated                                                             |
| Wnt3a                  | Wnt family member 3A                                                            |
| Wnt4                   | Wnt family member 4                                                             |
| Wt                     | Wild type                                                                       |
| WT1                    | William's tumor 1                                                               |
| Y27632 dihydrochloride | Trans-4-[(1R)-1-aminoethyl]-N-4-pyridinylcyclohexanecarboxamide dihydrochloride |
| ZO-1                   | Zona occludin 1                                                                 |

---

Reference: <http://www.genecards.org>; <https://www.wikigenes.org>; Nomenclature: International Union of Pure and Applied Chemistry (IUPAC).
